## Using mass spectrometry to investigate fluorescent compounds in squirrel fur.

By: Bryan Hughes<sup>1\*</sup>, Jeff Bowman<sup>2</sup>, Naomi L. Stock<sup>3</sup>, Gary Burness<sup>1</sup>

<sup>1</sup>*Department of Biology, Trent University, 1600 West Bank Drive, Peterborough Ontario K9L 0G2*

<sup>2</sup>*Ontario Ministry of Natural Resources and Forestry, Trent University DNA Building, 2140 East Bank Drive*

<sup>3</sup>*Water Quality Centre, Trent University, 1600 West Bank Drive, Peterborough Ontario Canada K9L 0G2*

**Abstract:** While an array of taxa are capable of producing fluorescent pigments, fluorescence in mammals is a novel and poorly understood phenomenon. We believe that a first step towards understanding the potential adaptive functions of fluorescence in mammals is to develop an understanding of fluorescent compounds, or fluorophores, that are present in fluorescent tissue. Here we use Fourier transform-ion cyclotron resonance mass spectrometry (FT-ICR MS) of flying squirrel fur known to fluoresce under ultraviolet (UV) light to identify potentially fluorescent compounds in squirrel fur. All of the potentially fluorescent compounds we identified were either present in non-fluorescent fur or were not present in all species of fluorescent flying squirrel. Therefore, we consider that the compounds responsible for fluorescence in flying squirrels may also be present in non-fluorescent mammal fur. Some factor currently unexplained likely leads to excitation of fluorophores in flying squirrel fur. A recently suggested hypothesis that fluorescence in mammals is widely caused by porphyrins is consistent with our findings.

**Keywords:** Fluorescence, mass spectrometry, fluorophores, flying squirrel, *Glaucomys*, UV.

## INTRODUCTION:

Ultraviolet (UV) fluorescence is a physicochemical phenomenon present in an array of biological taxa and geographical landscapes [1]. There is substantial research on the occurrence of fluorescence in plants [2] and invertebrates [3, 4]. There is also increasing evidence to suggest that many vertebrates have fluorescent pigments, including birds [5-7], amphibians [8], reptiles [9, 10], fish [11] and mammals [1, 12-15]. Several hypotheses aim to explain an ecological role of fluorescence in vertebrates. For example, it has been suggested that fluorescence may function as an anti-predator defence mechanism, such as camouflage [11], aposematism [16] or mimicry [1]. Alternatively, some species may use fluorescence as a visual signal for mating [7, 17, 18]. In many cases, the role of fluorescence is either not fully understood [19, 20] the result of an artefact, or lacks sufficient evidence to suggest a specific function [21]. Further investigation into the chemical mechanisms resulting in fluorescence may provide insight into the potential ecological role of fluorescence in vertebrates.

Fluorescence occurs when a molecule, known as a fluorophore, is excited by electromagnetic radiation. This excitation causes electrons within the molecule to move to an energized state. As the electron transitions back to its ground state, excess energy is lost in the form of a longer wavelength of light [22, 23]. The energy emitted from this reaction produces the vivid fluorescent colours seen in many different ecological systems. Since fluorescence is not the only method for a molecule to return to its non-energized state, there are a few structural characteristics that can be used to predict if a molecule can transmit fluorescent wavelengths. Generally, fluorescence requires a planar conjugated system with alternating single and double carbon bonds. For example, the ability of aromatic molecules to fluoresce is well documented [24, 25]. Other molecules that contain an aromatic ring, such as tryptophan and its derivatives are

also capable of fluorescence at different wavelengths [13]. The fluorescence of aromatics is dependent on the de-excitation of an electron from the highest occupied molecular orbital (HOMO) to the lowest unoccupied molecular orbital (LUMO), also known as the HOMO-LUMO gap [26, 27]. Aromatic rings with highly conjugated systems have comparatively small HOMO-LUMO energy gaps that emit ultraviolet wavelengths [27, 28]. Therefore, we would expect that any compound meeting these characteristics should be potentially fluorescent.

At one time, only aromatic compounds were thought to be fluorescent, however non-aromatic compounds that contain conjugated  $\pi$ -bonded systems may also fluoresce [23, 29, 30].

Fluorescent compounds that lack an aromatic ring include non-aromatic steroid hormones such as cortisone and aldosterone. [29].

Across taxa, several different fluorophores have been identified. For example, many species of parrot have fluorescent plumage due specialized psittacofulvine pigments [31]. The plumage of many nocturnal birds, such as owls (Strigiformes) and nightjars (Caprimulgiformes) fluoresce due to an accumulation of the compound coproporphyrin III [5]. Fluorophores in amphibians may include dihydrosoquinolinone derivatives, such as those found in the glandular secretions of certain tree frogs [8]. In fish, there are a variety of different compounds and proteins responsible for different fluorescent patterns [11]. An accumulation of uroporphyrin I causes fluorescence in the teeth and bones of eastern fox squirrels (*Sciurus niger*) [32]. Although there are many known fluorophores, the specific cause of fluorescence in many species remains unknown. For example, the shells of certain marine turtles [9] and the beaks of puffins (*Fratercula* spp.) [6] are known to fluoresce, however the chemical mechanism causing this is unclear. Identifying potential fluorophores is a first step in understanding whether fluorescence has a function, and what that function may be.

Historic observations suggested that fluorescence in mammals was limited to the least weasel (*Mustela nivalis*) and some Australian marsupials such as the red kangaroo (*Macropus rufus*) and the grey possum (*Trichosurus vulpecula*) [33, 34]. More recent research found no evidence of fluorescence within the least weasel or red kangaroo and therefore fluorescence was believed at one time to be limited to Didelphidae [13, 35]. Fluorescence has now been observed in all major taxonomic clades of mammals. Within eutherians, fluorescence has been observed in the fur of all extant species of North American flying squirrel (*Glaucomys* spp.) [1], nocturnal springhares (*Pedetidae* spp.) [12], the Coxings white-bellied rat (*Niviventer coninga*), the scales of the Chinese pangolin (*Manis pentadactyla*) [14], and the quills of European hedgehogs (*Erinaceus europaeus*) [36]. The fur of monotremes such as the platypus (*Ornithorhynchus anatinus*) is also fluorescent [15]. Fluorescence in the fur of marsupials has also recently been shown to include wombats (*Diprotodontia* spp.), gliders (*Petaurus* spp.), and bandicoots (*Peramelidae* spp.) [37]. While there is some evidence to suggest that some nocturnal mammals may be capable of detecting fluorescent pigmentation it remains unknown whether fluorescence has an ecologically significant role [38, 39]. Most recently, Toussaint et al. (2021) [40] have suggested that fluorescence in mammals is widespread and caused by an accumulation of porphyrins. They further suggested that porphyrins break down through exposure to UV, and consequently, we might expect fluorescence to be more common among nocturnal species.

While porphyrins appear to cause fluorescence in the bones, teeth, and pelage of certain mammals [32, 40], other fluorophores are known to cause fluorescence in mammal fur, including tryptophan and tryptophan derivatives [13]. Tryptophan is one of three aromatic amino acids [24], while tryptophan derivatives, including 3-hydroxylanthranilic acid, kynurenine, kynurenic acid, and xanthurenic acid are all conjugated molecular systems that contain an aromatic ring.

While the presence of an aromatic ring does suggest that these compounds are capable of fluorescence, they exhibit a range of different fluorescent colours. The colour of fluorescence within a compound is governed by the position of different functional groups [41]. For example, possums exhibit a range of fluorescent colours dependent on the stage of tryptophan catabolism [13]. The compound 3-hydroxyanthalnic acid is a product of tryptophan catabolism that produces a blue fluorescence [13]. Similarly, tryptophan derivatives such as kynurenic acid and xanthurenic acid are known to produce red fluorescence, while kynurenine produces a yellow fluorescence [13].

Fluorescence in eutherian mammals is a poorly understood phenomenon. The dorsal pelage of North American flying squirrels has a blue, fluorescent hue, whereas the ventral pelage is a more vibrant pink [1]. There is no apparent difference in intensity between sex, habitat, or locality [1]. Due to the extensive geographic range of flying squirrels, it has been suggested as unlikely that the observed fluorescence is the product of diet [1]. We currently do not understand the cause of fluorescence in flying squirrels, or whether this is an adaptive trait. Several potential adaptive benefits of fluorescence in flying squirrels may include anti-predator defense mechanisms and social communication; however, fluorescence may also be an artefact [1, 40]. We consider establishing biochemical pathways a good starting point to better our understanding of the evolutionary processes leading to this trait.

Here, we use mass spectrometry to investigate potentially fluorescent compounds within the fur of North American flying squirrels. We hypothesize that their fur should contain potentially fluorescent compounds that do not occur in fur from non-fluorescing squirrel species.

## METHODS AND MATERIALS

*Preparation of fur samples:* We obtained fur samples from two known fluorescing squirrel species and three non-fluorescing species. All samples were taken from frozen specimens collected with authorization. Fluorescent samples included one northern and one southern flying squirrel (*Glaucomys sabrinus* and *G. volans* respectively). Two ventral samples, and one dorsal sample were obtained from each of the two fluorescing species. For each sample, approximately 20 mg of fur were collected by trimming the squirrel hair, and not taking the hair follicle.

To obtain fur from non-fluorescing species, we took fur from two gray squirrels (*Sciurus carolinensis*), two red squirrels (*Tamiasciurus hudsonicus*) and one eastern chipmunk (*Tamias striatus*). Approximately 20 mg of fur from the ventral pelage of the two red squirrels; approximately 40 mg of fur from the ventral pelage of the chipmunk, split into two 20 mg samples; and 20 mg of fur from the dorsal region of each grey squirrel was collected.

All fur samples were placed into separate 50 mL polypropylene centrifuge tubes filled with 5 mL of methanol (HPLC grade; Thermo Fisher Scientific, Whitby ON Canada). To help isolate ions for the mass spectra analysis, samples were sonicated (Model 8892; Cole-Parmer, Barrie ON Canada) for 10 minutes. Finally, we placed each sample in a centrifuge (Model IEC, CentraCL2; Thermo Fisher Scientific) at 4000 rpm for 4 minutes to help separate the methanol from the solid fur. We used four centrifuge tubes filled with only 5 mL of methanol as control samples to account for any ions present due to the methanol or centrifuge tubes.

*Mass spectrometry analysis:* Methanolic extracts were analyzed using a Bruker Solarix XR Fourier transform-ion cyclotron resonance mass spectrometer (FT-ICR-MS) (Billerica MA USA) equipped with a 7T magnet and an electrospray ionization (ESI) source and located in the Water

Quality Centre at Trent University. Prior to analyses, the system was externally mass calibrated using sodium trifluoroacetate, 0.1 mg/mL in methanol. All samples were analyzed in both positive and negative ion modes over a mass range of  $m/z$  54 to 2000. Spectra were acquired using Bruker ftms Control software (version 2.1.0). For each sample, 100 scans were obtained, with 1 million data points collected per scan. The free ion decay (FID) was 0.2621 s. The temperature of the ESI source was 200°C, nebulizer gas was set to 1 bar, and dry gas flow rate was 4 L/min. Samples were infused into the ESI source using a flow rate of 180  $\mu$ L/hr.

*Fluorescence analysis:* Aliquots ( 2 ml) of each methanolic extract were concentrated 10-fold using a nitrogen evaporator (Organomation; Berlin MA, USA) and high purity nitrogen (Praxair Peterborough ON, Canada) and analyzed for fluorescent intensity at different wavelengths using a SpectraMax M3. Multi-Mode Microplate reader (Molecular Devices; San Jose, CA, USA). For each sample, 1 ml was extracted using a 1 ml Eppendorf pipette and placed into a polystyrene cuvette for analysis. Associated curves were obtained using SoftMax Pro at a fixed excitation wavelength of 350 nm, scanning for emissions at 400 nm to 600 nm.

*Data analysis:* Mass spectra were analyzed using the Bruker Compass Data Analysis software (Version 5.0) and a peak list was obtained for each sample. Each peak corresponds to a unique mass-to-charge value ( $m/z$ ). To isolate potential fluorophores, we performed two differential analysis tests of our mass spectral data. First, we evaluated known fluorescing and non-fluorescing squirrel fur, in both positive and negative ion modes. The fluorescent samples included both dorsal and both ventral samples from each of the two species of flying squirrel. Peaks that were observed in both fluorescing and non-fluorescing fur samples were excluded,

resulting in a list of potential ions of interest. For each ion of interest, a tentative chemical formula and mass accuracy was determined using the Bruker Compass Data Analysis software and the Metlin Database [42]. Mass accuracy was calculated using:

$$\text{mass accuracy (ppm)} = \frac{M_{\text{observed}} - M_{\text{calculated}}}{M_{\text{calculated}}} \times 10^6$$

where  $M_{\text{observed}}$  is the experimental  $m/z$  value and  $M_{\text{calculated}}$  is the calculated  $m/z$  value. Values may be positive, indicating that the observed  $m/z$  is larger than the calculated  $m/z$ , or negative, indicating that the observed  $m/z$  is smaller than the calculated  $m/z$ .

Second, we examined the peak lists, obtained in both positive and negative ion modes, from ventral and dorsal fur samples of fluorescent fur, irrespective of flying squirrel species. Due to the different colour hues found in the different pelage locations on flying squirrels, all fur from the ventral pink portion of the northern and southern flying squirrel were examined separately from the dorsal blue fur. We recorded all peaks found only in the ventral or dorsal fur samples; peaks that were also observed in the fur of the non-fluorescing species were excluded. Again, we used Bruker Compass Data Analysis software to determine a tentative chemical formula and mass accuracy for each ion of interest.

## RESULTS

*Analysis of ions of interest in fluorescent and non-fluorescent fur:* Following FT-ICR MS analysis, we compiled a list of positive (Table 1) and negative (Table 2) ions observed only in fluorescent flying squirrel fur samples. Several of these compounds may have had the necessary chemical structure to indicate capability to fluoresce. However, we did not identify any compounds present in both flying squirrel species that were absent in the three non-fluorescing species, which may have been indicative of the compound responsible for the fluorescence in



flying squirrels. Overall, we identified 22 tentative compounds that may be capable of fluorescence. While our initial analysis did not find any compounds present in both fluorescing species, we found eleven positive ions (Table 1) and five negative ions (Table 2) present in one of the fluorescing species but none of the non-fluorescing species.

Four of the positive ions identified in fluorescent fur occurred in the southern flying squirrel samples, while the remaining seven positive ions were found in the northern flying squirrel samples. All five negative ions found, were present in one or more of the northern flying squirrel samples, but not in any of the southern flying squirrel samples.

*Analysis of ions of interest within either ventral or dorsal fluorescent pelage:* We also found six compounds during our comparison of ventral and dorsal pelage, irrespective of flying squirrel species (Table 3). Of the six compounds, four compounds were found only in dorsal pelage, where two were found only in ventral pelage. These ions may contribute to the different colours of fluorescence observed in the dorsal and ventral fur of flying squirrels.

*Fluorescence analysis:* Our analysis of the fluorescent properties of all squirrel samples (See Supplementary Data – Fluorescence analysis) shows clear fluorescent emission when excited at 350 nm in flying squirrels compared to our blank samples filled with methanol. However, the samples containing gray and red squirrel fur both showed some capability of fluorescence when excited with the same 350 nm wavelength. The excitation of all samples at 350 nm may be indicative of potential fluorophores being present in both fluorescing and non-fluorescing fur.

## DISCUSSION

While fluorescence occurs in an array of species, the evolution and function of fluorescence in mammals is poorly understood. Before we can understand the potential for any function of

fluorescence in mammals, we believe it is helpful to understand the identity and function of mammalian fluorophores. We hypothesised that flying squirrels with fluorescent fur would have a unique compound present within their fur, that is not present within non-fluorescent fur of closely related squirrel species. To determine potentially fluorescent compounds, we performed two different mass spectral data analyses. We observed unique compounds present in the fluorescent fur of northern and southern flying squirrels that were not present in the fur of red squirrels, grey squirrels, or chipmunks. We also observed compounds present in either the dorsal or ventral fur irrespective of the flying squirrel species. However, we did not find a single unique compound present in both flying squirrel species that was not also present in the other squirrel species. Examining the fluorescence of all squirrel samples also showed that all fur contained some compounds that were capable of fluorescing. Therefore, we consider that the compound responsible for the vivid pink and blue fluorescence in flying squirrels, is likely present in other, non-fluorescing sciurids. Since the fur of other squirrel species does not naturally fluoresce like flying squirrels, it is likely that another factor is responsible for the excitation or production of fluorophores in flying squirrels.

Our expectation to find a unique fluorophore in flying squirrels was based on the presence of unique fluorophores in other taxonomic groups. For example, the skin of some tree frogs is known to produce vivid green, fluorescent pigments due to the presence of dihydroisoquinolinone derivatives, or hyloins [8]. Similarly, a unique group of pigment-compounds known as psittacofulvins are responsible for the bright plumage, and fluorescence of parrot feathers [31, 43, 44]. Unlike the unique fluorophores found in tree frogs and birds, all potentially fluorescent compounds that we observed in flying squirrel fur were either present in non-fluorescent fur from other squirrel species or were not found in samples taken from both the

dorsal and ventral regions of the flying squirrels (both of which fluoresce). Therefore, the specific fluorophore responsible for fluorescence in flying squirrels may be a compound present in non-fluorescent sciurid, or even all mammalian fur.

Our findings are consistent with suggestion of Toussaint et al. (2021) [40], who argued that fluorescence in mammals is widespread and due to porphyrins. Porphyrin-based fluorescence can result from porphyrins from the heme pathway accumulating in tissues. Interestingly, Toussaint et al. (2021) [40] suggested that nocturnal animals are more likely to exhibit fluorescence because porphyrin compounds are broken down by exposure to UV, and so would tend to accumulate more in nocturnal species. While the over-accumulation of porphyrins in mammals might be expected to have adverse effects on an individual's physiology, this appears to be a widespread phenomenon and may not lead to any fitness consequences. For example, fox squirrels appear resistant to the negative effect of abundant uroporphyrin III [32]. An over-accumulation of the compound uroporphyrin III in the bones and teeth of fox squirrels causes these anatomical structures to be fluorescent when exposed to ultraviolet light [32].

Other potential fluorophores in mammal fur are tryptophan derivatives found in possums [13, 35]. All possum fur appears to be fluorescent, where different fluorescent hues are associated with different tryptophan derivatives [13]. Tryptophan and tryptophan metabolites are used within the mammalian body system to produce many hormones. Tryptophan and tryptophan metabolites typically accumulate within the hair bulb of most mammal fur [13]. While tryptophan may be responsible for the fluorescence observed in flying squirrels, fur samples from all species contained tryptophan (Supplementary data –S2 negative mass spectrometer data, S3 Positive mass spectrometer data); therefore, we were unable to isolate tryptophan as the specific compound responsible for fluorescence in flying squirrels. However, as all mammalian fur with

tryptophan is not fluorescent, there may be another physiological mechanism or process responsible for fluorescence. Pine et al. (1985) [13] suggested that the difference in enzymic complement of skin tissue may result in the partial or alternate completion of tryptophan metabolism. As a result, different tryptophan derivatives tend to accumulate within different portions of the possum, resulting in different fluorescent pigments. More research is necessary to understand if the fluorescence of possums is the result of a higher accumulation of tryptophan, or another physiological mechanism altogether.

Perhaps the most enticing aspect of the recent observations of fluorescent mammals is the potential for fluorescent fur to be an adaptive trait. While it remains uncertain, evidence to date suggests that fluorescence in mammals may often be an artefactual result of biochemical synthesis [40, 45]. Fluorescence does appear to be an adaptive trait in some taxa, however. For example, the fluorescent plumage in parrots is believed to enhance visual mating signals, and there is correlation between fluorescent intensity and reproductive success [7, 44, 46]. Many marine fishes fluoresce as a form of camouflage, as they fluoresce in similar colours to the corals in their habitat [11, 47]. In many cases, the specific ecological role of fluorescence is simply unknown [9] or may simply be the by-product of pigment producing molecules, or even a retained vestigial trait with no adaptive function [19, 21, 48].

In summary, using the sample extraction described and FTICR-MS we did not find a unique fluorophore that appears to be responsible for the vivid fluorescence seen in flying squirrels. We have identified several compounds that may have the characteristics to be fluorescent, but none of these occurred in both flying squirrel species and consequently are not likely the cause of fluorescence in this clade. Our observations suggest that the fluorophore responsible for fluorescence in flying squirrels is a compound also found in the fur of non-fluorescing mammals.

Therefore, fluorescence in mammal fur may require a secondary form of activation or may rely on the accumulation of a specific compound common in mammal fur. There is also growing evidence to suggest that fluorescence in mammals may be the result of either porphyrin or tryptophan synthesis [12, 13, 36, 40, 45]. Since we did not find a unique fluorescent compound in flying squirrel fur, it remains possible that fluorescence in flying squirrels is the result of some biochemical pathway involving synthesis of one of these two compounds. It is also possible that the compound responsible for fluorescence was not extracted using methanol-sonication, or not observed using ESI mass spectrometry. Further research into specific physiological mechanisms in flying squirrels may help provide insight into what is causing fluorescence. While the observed fluorescence in flying squirrels may simply be a by-product of pigment, or even a vestigial trait the potential function of fluorescence may be an intriguing area of study.

#### ACKNOWLEDGMENTS

The authors are grateful to the Canadian Foundation for Innovation, and the Ontario Research Fund for funding instrumentation, including the Bruker SolariX XR FT-ICR mass spectrometer, in the Water Quality Centre of Trent University. We would also like to thank Phillip Biko Siambi at Noblegen for their help with fluorescence analysis.

## REFERENCES

1. Kohler AM, Olson ER, Martin JG, Anich PS (2019) Ultraviolet fluorescence discovered in New World flying squirrels ( *Glaucomys* ). *Journal of Mammalogy* 100:21–30. <https://doi.org/10.1093/jmammal/gyy177>
2. Cerovic GZ, Samson G, Morales F, Tremblay N, Moya I (1999) Ultraviolet-induced fluorescence for plant monitoring: present state and prospects. *Agronomie* 19:543–578. fffal-00885952
3. Ainsworth TD, Hoegh-Guldberg O, Leggat W (2008) Imaging the fluorescence of marine invertebrates and their associated flora. *Journal of Microscopy* 232:197–199. <https://doi.org/10.1111/j.1365-2818.2008.02089.x>
4. Kloock CT, Kubli A, Reynolds R (2010) Ultraviolet light detection: a function of scorpion fluorescence. *The Journal of Arachnology* 38:441–445. <https://doi.org/10.1636/B09-111.1>
5. Camacho C, Negro JJ, Redondo I, Palacios S, Sáez-Gómez P (2019) Correlates of individual variation in the porphyrin-based fluorescence of red-necked nightjars (*Caprimulgus ruficollis*). *Scientific Reports* 9:19115. <https://doi.org/10.1038/s41598-019-55522-y>
6. Dunning J, Diamond AW, Christmas SE, Cole EL, Holberton RL, Jackson HJ, Kelly KG, Brown D, Rivera IR, Hanley D (2018) Photoluminescence in the bill of the Atlantic Puffin *Fratercula arctica*. *Bird Study* 65:570–573. <https://doi.org/10.1080/00063657.2018.1563771>
7. Hausmann F, Arnold KE, Marshall J, Owens IPF (2003). Ultraviolet signals in birds are special. *Proceedings of the royal society of London Series B: Biological Sciences* 270 (1510), 61-67.
8. Taboada C, Brunetti AE, Pedron FN, Neto FC, Estrin DA, Bari SE, Chemes LB, Lopes NP, Lagorio MG, Faivovich J (2017) Naturally occurring fluorescence in frogs. *PNAS* 114:3672–3677. <https://doi.org/10.1073/pnas.1701053114>
9. Gruber DF, Sparks JS (2015) First observation of fluorescence in marine turtles. *novi* 2015:1–8. <https://doi.org/10.1206/3845.1>
10. Prötzel D, Heß, M, Scherz MD, Schwager M, Padjé AV, Glaw F (2018) Widespread bone-based fluorescence in chameleons. *Sci rep*, 8, 698: <https://doi.org/10.1038/s41598-017-19070-7>
11. Sparks JS, Schelly RC, Smith WL, Davis MP, Tchernov D, Pieribone VA, Gruber DF (2014) The covert world of fish biofluorescence: A phylogenetically widespread and phenotypically variable phenomenon. *PLOS ONE* 9:e83259. <https://doi.org/10.1371/journal.pone.0083259>

12. Olson ER, Carlson MR, Ramanujam VMS, Sears L, Anthony SE, Anich PS, Ramon L, Hulstrand A, Jurewicz M, Gunnelson A, Kohler AM, Martin JG (2021) Vivid biofluorescence discovered in the nocturnal Springhare (Pedetidae). *Scientific Reports* 11:4125. <https://doi.org/10.1038/s41598-021-83588-0>
13. Pine RH, Rice JE, Bucher JE, Tank DH (1985) Labile pigments and fluorescent pelage in didelphid marsupials. *Mammalia* 49:249–256. <https://doi.org/10.1515/mamm.1985.49.2.249>
14. Jeng M-L (2019) Biofluorescence in terrestrial animals, with emphasis on Fireflies: A review and field observation. In: Suzuki H (ed) *Bioluminescence - Analytical Applications and Basic Biology*. IntechOpen
15. Anich PS, Anthony S, Carlson M, Gunnelson A, Kohler AM, Martin JG, Olson E (2020) Biofluorescence in the platypus (*Ornithorhynchus anatinus*). *Mammalia* 1: <https://doi.org/10.1515/mammalia-2020-0027>
16. Duchatelet L, Pinte N, Tomita T, Sato K, Mallefet J (2019) Etmopteridae bioluminescence: dorsal pattern specificity and aposematic use. *Zoological Letters* 5:9. <https://doi.org/10.1186/s40851-019-0126-2>
17. Barreira AS, Lagorio MG, Lijtmaer DA, Lougheed SC, Tubaro PL (2012) Fluorescent and ultraviolet sexual dichromatism in the blue-winged parrotlet. *Journal of Zoology* 288:135–142. <https://doi.org/10.1111/j.1469-7998.2012.00931.x>
18. Pearn SM, Bennett ATD, Cuthill IC (2001) Ultraviolet vision, fluorescence and mate choice in a parrot, the budgerigar *Melopsittacus undulatus*. *Proceedings of the Royal Society of London Series B: Biological Sciences* 268:2273–2279. <https://doi.org/10.1098/rspb.2001.1813>
19. Weidensaul CS, Colvin BA, Brinker DF, Huy JS (2011) Use of ultraviolet light as an aid in age Classification of Owls. *The Wilson Journal of Ornithology* 123:373–377. <https://doi.org/10.1676/09-125.1>
20. Haddock SHD, Dunn CW (2015) Fluorescent proteins function as a prey attractant: experimental evidence from the hydromedusa *Olindias formosus* and other marine organisms. *Biology Open* 4:1094–1104. <https://doi.org/10.1242/bio.012138>
21. Marshall J, Johnsen S (2017) Fluorescence as a means of colour signal enhancement. *Philosophical Transactions of the Royal Society B: Biological Sciences* 372:20160335. <https://doi.org/10.1098/rstb.2016.0335>
22. Jameson D, Croney J, Moens P (2003) Fluorescence: Basic concepts, practical aspects, and some anecdotes. *Methods in Enzymology* 1–43. [https://doi.org/10.1016/S0076-6879\(03\)60105-9](https://doi.org/10.1016/S0076-6879(03)60105-9)
23. Shimizu M, Hiyama T (2010) Organic fluorophores exhibiting highly efficient photoluminescence in the solid state. *Chemistry – An Asian Journal* 5:1516–1531. <https://doi.org/10.1002/asia.200900727>

24. Teale FWJ, Weber G (1957) Ultraviolet fluorescence of the aromatic amino acids. *Biochem J* 65:476–482
25. Nijegorodov NI, Downey WS (1994) The influence of planarity and rigidity on the absorption and fluorescence parameters and intersystem crossing rate constant in aromatic molecules. *J Phys Chem* 98:5639–5643. <https://doi.org/10.1021/j100073a011>
26. Eshelman E, Daly MG, Slater G, Cloutis E (2018) Detecting aromatic compounds on planetary surfaces using ultraviolet time-resolved fluorescence spectroscopy. *Planetary and Space Science* 151:1–10. <https://doi.org/10.1016/j.pss.2017.09.003>
27. Uchiyama S, Santa T, Imai K (1999) Fluorescence characteristics of six 4,7-disubstituted benzofurazan compounds: an experimental and semi-empirical MO study. *Journal of the Chemical Society, Perkin Transactions 2* 0:2525–2532. <https://doi.org/10.1039/A904989D>
28. Li Q, Tang Y, Hu W, Li Z (2018) Fluorescence of nonaromatic organic systems and room temperature phosphorescence of organic luminogens: The intrinsic Principle and Recent Progress. *Small* 14:1801560. <https://doi.org/10.1002/sml.201801560>
29. Fedorov VI, Cherkasova OP, Samoilova ES (2004) Native fluorescence of steroid hormones excited by UV laser radiation. In: *Saratov Fall Meeting 2003: Optical Technologies in Biophysics and Medicine V*. International Society for Optics and Photonics, pp 80–87
30. Dawson WR, Windsor MW (1968) Fluorescence yields of aromatic compounds. *J Phys Chem* 72:3251–3260. <https://doi.org/10.1021/j100855a027>
31. Pearlstein E, Hughs M, Mazurek J, McGraw K, Pesme C, Reidler R, Gleeson M (2015) Ultraviolet-Induced visible fluorescence and chemical analysis as tools for examining featherwork. *Journal of the American Institute for Conservation* 54:149–167. <https://doi.org/10.1179/1945233015Y.0000000010>
32. Levin EY, Flyger V (1973) Erythropoietic Porphyria of the Fox Squirrel (*Sciurus niger*). *The Journal of Clinical Investigation*. 52(1):96-105 <https://www.jci.org/articles/view/107178/pdf>. Accessed 28 Oct 2019
33. Nicholls EM, Rienits KG (1971) Tryptophan derivatives and pigment in the hair of some Australian marsupials. *International Journal of Biochemistry* 2:593–603. [https://doi.org/10.1016/0020-711X\(71\)90031-0](https://doi.org/10.1016/0020-711X(71)90031-0)
34. Latham RM (1953) Simple Method for Identification of Least Weasel. *J Mammal* 34:385–385. <https://doi.org/10.1093/jmammal/34.3.385a>
35. Meisner DH (1983) Psychedelic opossums: fluorescence of the skin and fur of *Didelphis virginiana* Kerr. *The Ohio Journal of Science* 83:
36. Hamchand R, Lafountain AM, Büchel R, Maas KR, Hird S, Warren M, Frank HA, Brückner C (2021) Red fluorescence of European Hedgehog (*Erinaceus europaeus*) spines results from free-base porphyrin of potential microbial origin. *Journal of Chemical Ecology* 1-9.



37. Reinhold L (2021) Mammals with fluorescent fur: Observations from the Wet Tropics. North Queensland naturalist 1–8
38. McDonald B, Geiger B, Vrla S (2020) Ultraviolet vision in Ord's kangaroo rat (*Dipodomys ordii*). Journal of Mammalogy 101:1257–1266. <https://doi.org/10.1093/jmammal/gyaa083>
39. Yolton RL, Yolton DP, Renz J, Jacobs GH (1974) Preretinal absorbance in sciurid eyes. J Mammal 55:14–20. <https://doi.org/10.2307/1379253>
40. Toussaint S, Ponstein J, Thoury M, Métivier R, Kalthoff D, Habermeyer B, Guillard R, Bock S, Mortensen P, Sandberg S, Gueriau P, Amson E. 2021. Fur glowing under UV: a widespread consequence of porphyrin accumulation in mammals. Research Square doi: 10.21203/rs.3.rs-499384/v2.
41. Du J, Wang H, Wang L, Zhu S, Song Y, Yan B, Sun H (2016) Insight into the effect of functional groups on visible-fluorescence emissions of graphene quantum dots. J Mater Chem C 4:2235–2242. <https://doi.org/10.1039/C6TC00548A>
42. Guijas, C., Montenegro-Burke, J.R., Domingo-Almenara, X., Palermo, A., Warth, B., Hermann, G., Koellensperger, G., Huan, T., Uritboonthai, W. Aisporna, A.E., Wolan, D.W., Spilker, M.E., Benton, H.P., Siuzdak, G., (2018). METLIN: A Technology Platform for Identifying Knowns and Unknowns. Analytical Chemistry, 90, 3156-3164. DOI:10.1021/acs.analchem.7b04424<[http://apps.webofknowledge.com/DaisyOneClickSearch.do?product=WOS&search\\_mode=DaisyOneClickSearch&colName=WOS&SID=6FXTH8V8ZmLymkLazuX&author\\_name=Siuzdak,%20G&dais\\_id=99107&excludeEventConfig=ExcludeIfFromFullRecPage](http://apps.webofknowledge.com/DaisyOneClickSearch.do?product=WOS&search_mode=DaisyOneClickSearch&colName=WOS&SID=6FXTH8V8ZmLymkLazuX&author_name=Siuzdak,%20G&dais_id=99107&excludeEventConfig=ExcludeIfFromFullRecPage)>
43. Tinbergen J, Wilts BD, Stavenga DG (2013) Spectral tuning of Amazon parrot feather coloration by psittacofulvin pigments and spongy structures. Journal of Experimental Biology 216:4358–4364. <https://doi.org/10.1242/jeb.091561>
44. Stradi R, Pini E, Celentano G (2001) The chemical structure of the pigments in Ara macao plumage. Comparative Biochemistry and Physiology Part B: Biochemistry and Molecular Biology 130:57–63. [https://doi.org/10.1016/S1096-4959\(01\)00402-X](https://doi.org/10.1016/S1096-4959(01)00402-X)
45. Croce A,C. Light and autofluorescence, multitasking features in living organisms. Photochem 2021, 1, 67-124. <https://doi.org/10.3390/photochem1020007>
46. Arnold KE, Owens IPF, Marshall NJ (2002) Fluorescent signaling in parrots. (Ecology). Science 295:92–93
47. Anthes N, Theobald J, Gerlach T, Meadows MG, Michiels NK (2016) Diversity and ecological correlates of red fluorescence in marine fishes. Front Ecol Evol 4:.
48. Wankhede RA, Frost LR (2004) Extraction, isolation, identification and distribution of soluble fluorescent compounds from the cuticle of scorpion (*Hadrurus Arizonensis*).

**Table 1.** The mass spectra characteristics for the positive ions found in all examined southern (*Glaucomys volans*) or northern (*Glaucomys sabrinus*) flying squirrel fur samples, with a tentative chemical formula obtained from the Metlin Database.

| Species                   | Mass observed (m/z) | Potential formula (M)                                        | Ion Observed        | Mass calculated (m/z) | Mass accuracy |
|---------------------------|---------------------|--------------------------------------------------------------|---------------------|-----------------------|---------------|
| <i>Glaucomys volans</i>   | 152.13025           | C <sub>9</sub> H <sub>15</sub> N <sub>2</sub>                | [M+H] <sup>+</sup>  | 152.1308              | -3.61         |
| <i>Glaucomys volans</i>   | 297.03567           | C <sub>11</sub> H <sub>8</sub> N <sub>2</sub> O <sub>8</sub> | [M+H] <sup>+</sup>  | 297.0353              | 1.25          |
| <i>Glaucomys volans</i>   | 333.29533           | C <sub>19</sub> H <sub>41</sub> O <sub>2</sub> P             | [M+H] <sup>+</sup>  | 333.2917              | 10.89         |
| <i>Glaucomys sabrinus</i> | 142.06309           | C <sub>5</sub> H <sub>7</sub> N <sub>3</sub> O <sub>2</sub>  | [M+H] <sup>+</sup>  | 142.0611              | 14.008        |
| <i>Glaucomys sabrinus</i> | 194.19035           | C <sub>13</sub> H <sub>23</sub> N                            | [M+H] <sup>+</sup>  | 194.1903              | 0.26          |
| <i>Glaucomys sabrinus</i> | 201.06423           | C <sub>9</sub> H <sub>7</sub> F <sub>3</sub> N <sub>2</sub>  | [M+H] <sup>+</sup>  | 201.0634              | 3.98          |
| <i>Glaucomys sabrinus</i> | 216.07481           | C <sub>9</sub> H <sub>8</sub> F <sub>3</sub> N <sub>3</sub>  | [M+H] <sup>+</sup>  | 216.0743              | 2.36          |
| <i>Glaucomys sabrinus</i> | 309.25849           | C <sub>23</sub> H <sub>32</sub>                              | [M+H] <sup>+</sup>  | 309.2577              | 2.55          |
| <i>Glaucomys sabrinus</i> | 323.29311           | C <sub>19</sub> H <sub>40</sub> O <sub>2</sub>               | [M+Na] <sup>+</sup> | 323.2920              | 3.43          |
| <i>Glaucomys sabrinus</i> | 349.21466           | C <sub>22</sub> H <sub>26</sub> N <sub>3</sub> O             | [M+H] <sup>+</sup>  | 349.2149              | -0.57         |
| <i>Glaucomys sabrinus</i> | 349.25123           | C <sub>18</sub> H <sub>37</sub> O <sub>4</sub> P             | [M+H] <sup>+</sup>  | 349.2506              | 1.72          |

**Table 2:** Mass spectra characteristics for all negative ions observed in either the northern (*Glaucomys sabrinus*) or southern (*Glaucomys volans*) flying squirrel fur, with a tentative chemical formula obtained from the Metlin database.

| Species          | Mass              |                                                | Ion                | Mass                |                  |
|------------------|-------------------|------------------------------------------------|--------------------|---------------------|------------------|
|                  | observed<br>(m/z) | Potential<br>formula (M)                       |                    | calculated<br>(m/z) | Mass<br>accuracy |
| <i>Glaucomys</i> |                   |                                                |                    |                     |                  |
| <i>volans</i>    | 85.06635          | C <sub>5</sub> H <sub>10</sub> O               | [M-H] <sup>-</sup> | 85.0658             | 5.41             |
| <i>Glaucomys</i> |                   |                                                |                    |                     |                  |
| <i>volans</i>    | 155.14434         | C <sub>10</sub> H <sub>20</sub> O              | [M-H] <sup>-</sup> | 155.1441            | 1.29             |
| <i>Glaucomys</i> |                   |                                                |                    |                     |                  |
| <i>volans</i>    | 208.98364         | C <sub>6</sub> H <sub>11</sub> I               | [M-H] <sup>-</sup> | 208.9833            | 1.63             |
| <i>Glaucomys</i> |                   |                                                |                    |                     |                  |
| <i>volans</i>    | 251.23845         | C <sub>17</sub> H <sub>32</sub> O              | [M-H] <sup>-</sup> | 251.2380            | 1.63             |
| <i>Glaucomys</i> |                   |                                                |                    |                     |                  |
| <i>volans</i>    | 291.23335         | C <sub>19</sub> H <sub>32</sub> O <sub>2</sub> | [M-H] <sup>-</sup> | 291.2330            | 1.20             |

**Table 3.** Mass spectrometer characteristics for all unique compounds found in only dorsal or only ventral pelage of northern (*Glaucomys sabrinus*) and southern (*Glaucomys volans*) flying squirrel species. Samples from the two species were pooled for analysis.

| Pelage  | Mass<br>observed<br>(m/z) | Potential<br>formula (M)                                      | Ion<br>Observed     | Mass<br>calculated<br>(m/z) | Mass<br>accuracy |
|---------|---------------------------|---------------------------------------------------------------|---------------------|-----------------------------|------------------|
| Dorsal  | 74.02629                  | CH <sub>5</sub> B <sub>2</sub>                                | [M+Cl] <sup>-</sup> | 74.0271                     | -10.94           |
| Dorsal  |                           |                                                               |                     |                             | 1.75             |
|         | 154.12374                 | C <sub>9</sub> H <sub>17</sub> NO                             | [M-H] <sup>-</sup>  | 154.12374                   |                  |
| Dorsal  | 217.18099                 | C <sub>12</sub> H <sub>26</sub> O <sub>3</sub>                | [M-H] <sup>-</sup>  | 217.18092                   | -0.32            |
| Dorsal  | 231.17562                 | C <sub>16</sub> H <sub>24</sub> O                             | [M-H] <sup>-</sup>  | 231.17544                   | -0.78            |
| Ventral | 443.20850                 | C <sub>26</sub> H <sub>28</sub> N <sub>4</sub> O <sub>3</sub> | [M-H] <sup>-</sup>  | 443.20886                   | 0.81             |
| Ventral | 580.50472                 | C <sub>34</sub> H <sub>67</sub> N <sub>3</sub> O <sub>4</sub> | [M-H] <sup>-</sup>  | 580.50588                   | 1.99             |

bioRxiv preprint doi: <https://doi.org/10.1101/2021.08.25.457702>; this version posted August 25, 2021. The copyright holder for this preprint (which was not certified by peer review) is the author/funder, who has granted bioRxiv a license to display the preprint in perpetuity. It is made available under aCC-BY 4.0 International license.

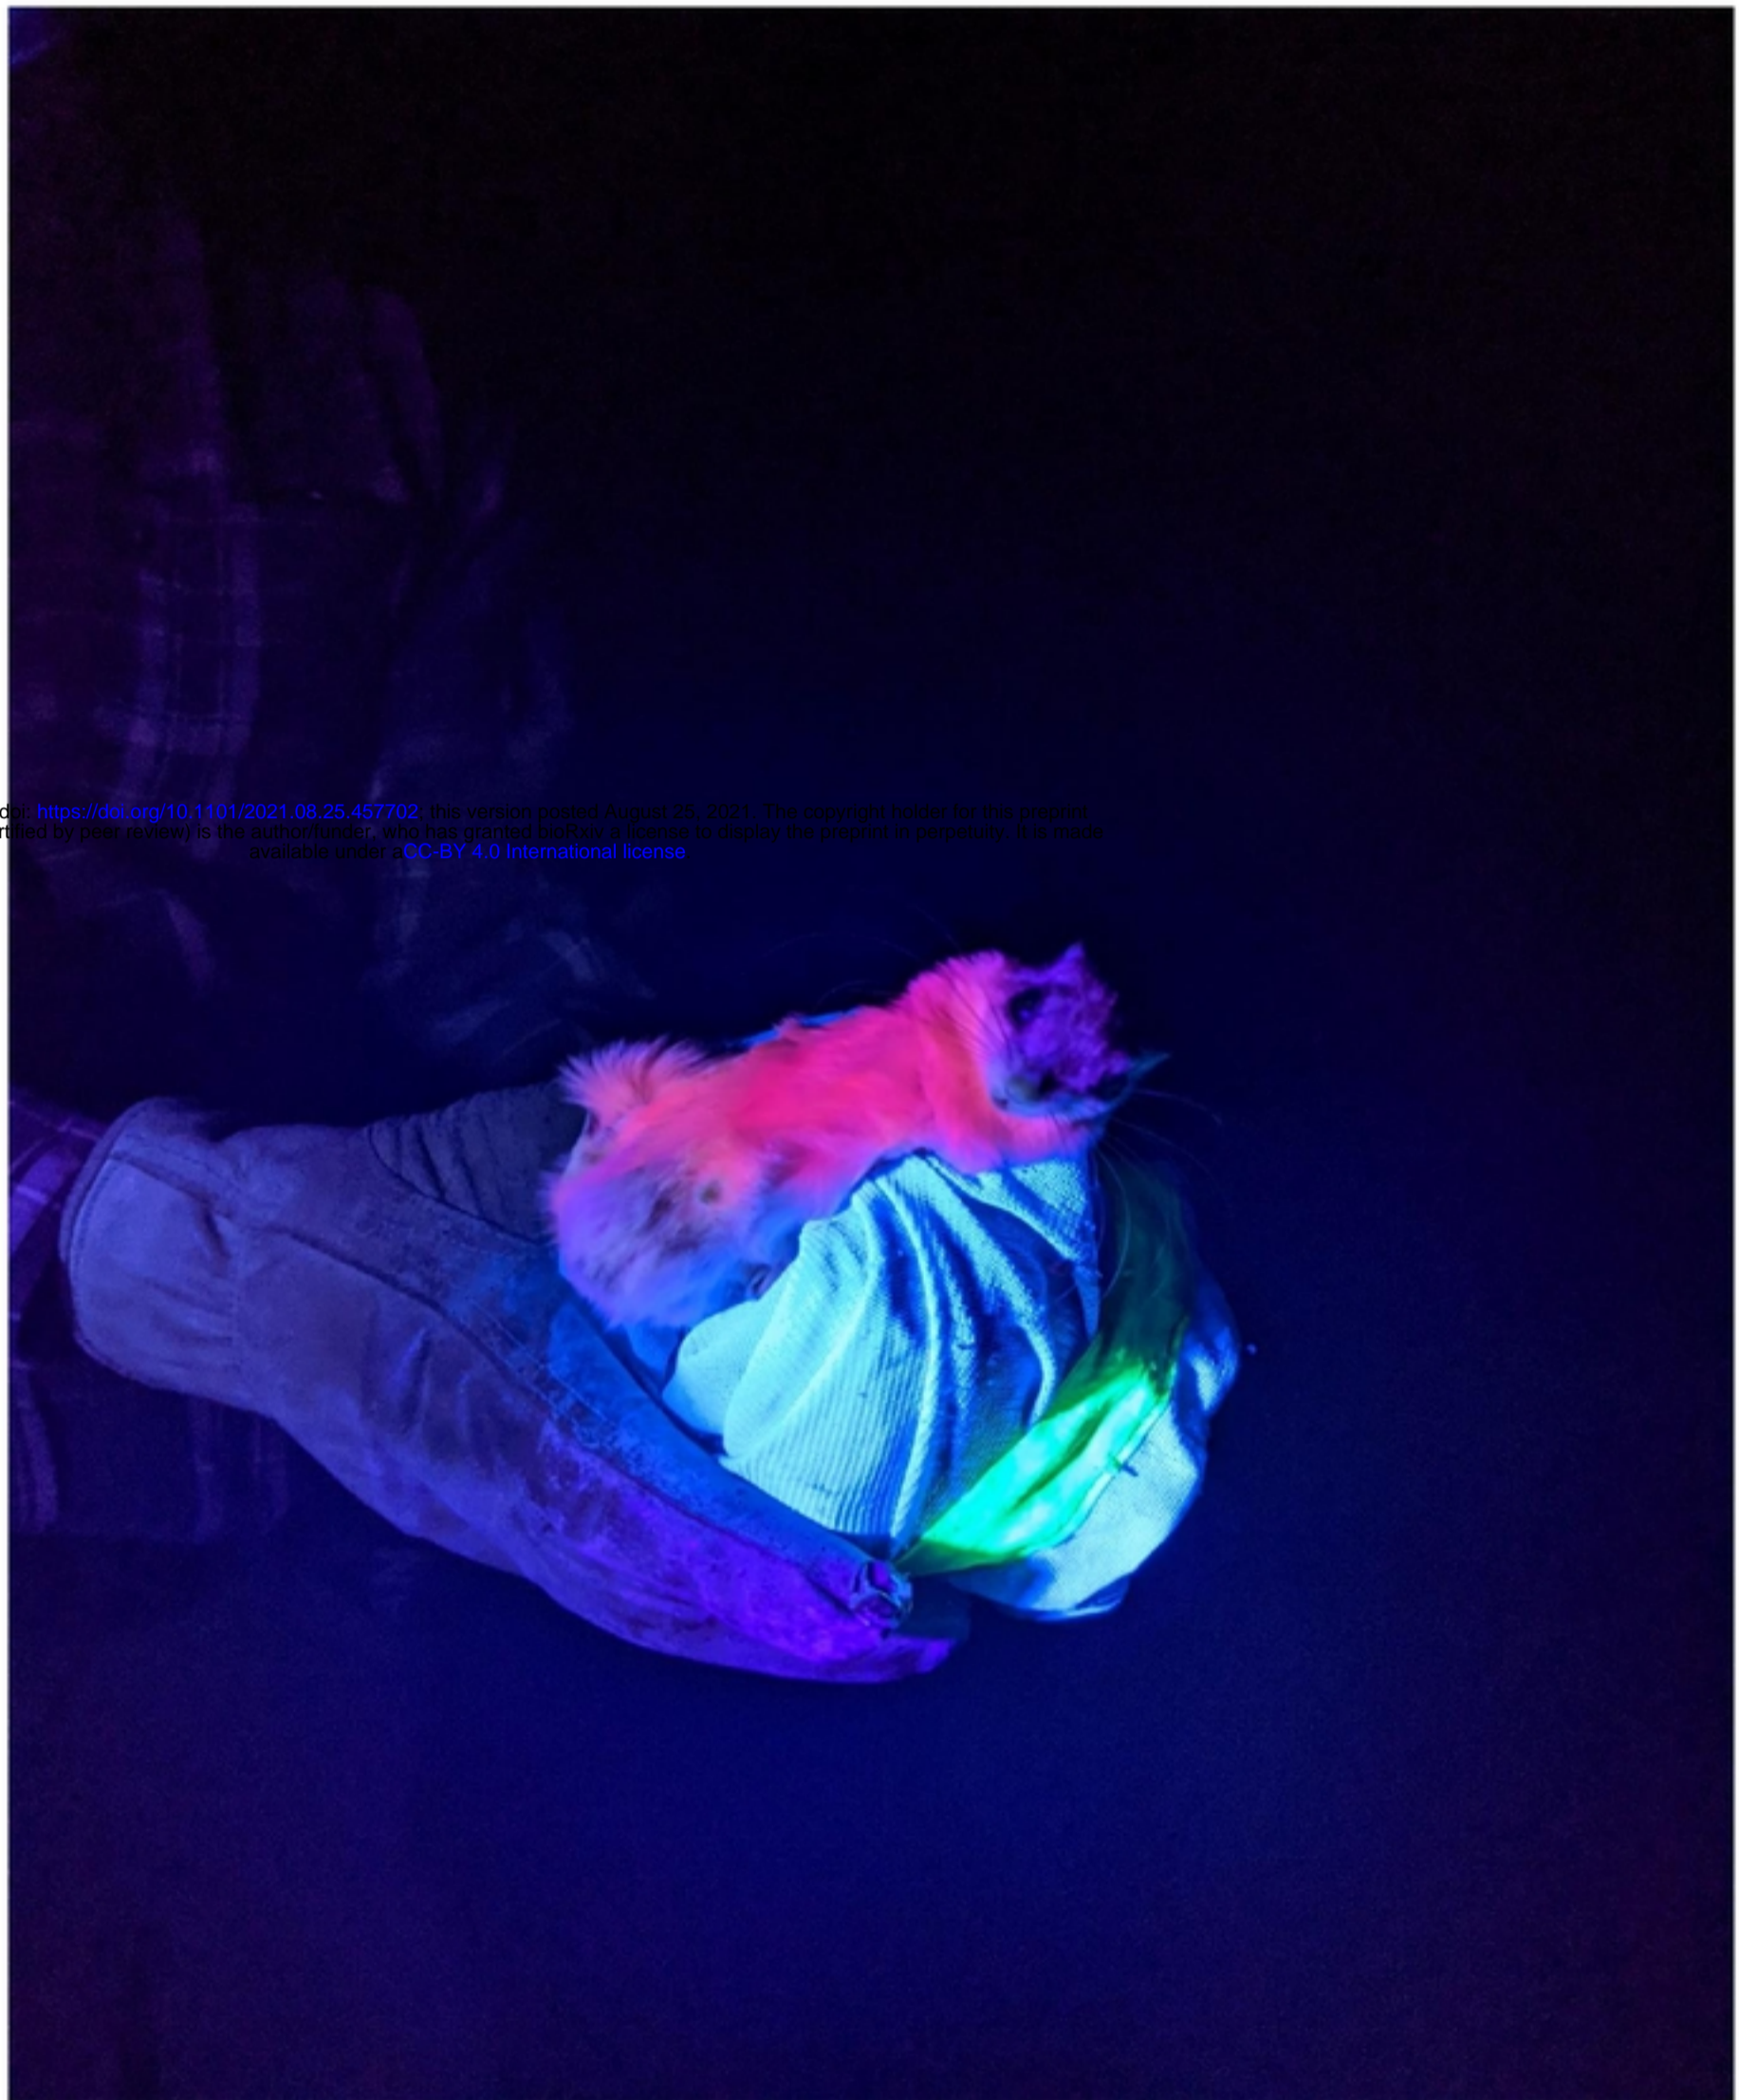

**Figure 1:** A male southern flying squirrel (*Glaucomys volans*) being held in a bag fluorescing under a UV blacklight. Showing the ventral portion of the body with the head on the Right. Photo courtesy of; Rebekah Persad, Trent University, Peterborough Ontario.
